# Supplementary material
Source: PubMed Central journal article supplement (PMC5368684)
Supplement: np6b01085_si_001.pdf [file np6b01085_si_001.pdf]

## SUPPORTING INFORMATION

### Fungal identification using Molecular Tools: A Primer for the Natural Products Research Community

Huzefa A. Raja,<sup>†</sup> Andrew N. Miller,<sup>‡</sup> Cedric J. Pearce,<sup>§</sup> Nicholas H. Oberlies<sup>†\*</sup>

<sup>†</sup>*Department of Chemistry and Biochemistry, University of North Carolina at Greensboro*

<sup>‡</sup>*Illinois Natural History Survey, University of Illinois, Champaign, Illinois 61820, USA*

<sup>§</sup>*Mycosynthetix, Inc., 505 Meadowland Dr., Suite 103, Hillsborough, NC 27278*

## CONTENTS

**Table S1.** Primers and PCR protocols for ribosomal genes and commonly utilized single-copy protein coding genes in fungal identification

**Table S2.** Do's and Don'ts for molecular identification of Fungi

Table S1. Primers and PCR protocols for ribosomal genes and commonly utilized single-copy protein coding genes in fungal identification

| Locus                                                               | Lineage                                                        | Primer                                                                                                                           | Primer Sequence 5'-3'                                                | Direction              | PCR protocol*                                                                                                                                                                           | Reference      |
|---------------------------------------------------------------------|----------------------------------------------------------------|----------------------------------------------------------------------------------------------------------------------------------|----------------------------------------------------------------------|------------------------|-----------------------------------------------------------------------------------------------------------------------------------------------------------------------------------------|----------------|
| Translation elongation factor 1-alpha ( <i>tefl</i> )<br>[~1000 bp] | All Fungi                                                      | EF1-983F<br><br>EF1-2218R<br><br>One of the most broadly used primers. This fragment extends nearly to the 3' end of <i>tefl</i> | GCY CCY GGH CAY CGT GAY TTY AT<br><br>AT GAC ACC RAC RGC RAC RGT YTG | Forward<br><br>Reverse | 1. 94°C – 2 min<br>2. 66°C – 56C<br>touchdown (9 cycles)<br>3. 94°C – 30 sec<br>4. 56°C – 1 min<br>5. 72°C – 1 min<br>6. Repeat 3–5 for 36 cycles<br>7. 72°C – 10 min<br>8. 4°C on hold | <sup>1</sup>   |
| Translation elongation factor 1-alpha ( <i>tefl</i> )<br>[~600 bp]  | All Fungi<br><br>A proposed secondary barcode marker for fungi | EF1-1018F<br><br>EF1-1620R<br><br>Note: EF1-1018F and EF1-1620R are internal primers to EF1-983F and EF1-2218R                   | GAY TTC ATC AAG AAC ATG AT<br><br>GAC GTT GAA DCC RAC RTT GTC        | Forward<br><br>Reverse | 1. 94°C – 2 min<br>2. 66°C – 56C<br>touchdown (9 cycles)<br>3. 94°C – 30 sec<br>4. 56°C – 1 min<br>5. 72°C – 1 min<br>6. Repeat 3–5 for 36 cycles<br>7. 72°C – 10 min<br>8. 4°C on hold | <sup>2</sup>   |
| RNA polymerase II subunit 1 ( <i>RPB1</i> )<br>[~1200 bp]           | All Fungi                                                      | RPB1af<br><br>RPB1cr                                                                                                             | GAR TGY CCD GGD CAY TTY GG<br><br>CCN GCD ATN TCR TTR TCC ATR TA     | Forward<br><br>Reverse | 1. 96°C – 5 min<br>2. 94°C – 30 sec<br>3. 52°C – 30 sec<br>4. 72°C – 1 min<br>5. Repeat 2–4 for 40 cycles<br>6. 72°C – 8 min<br>7. 4°C on hold                                          | <sup>3,4</sup> |
| RNA polymerase II subunit 2 ( <i>RPB2</i> )<br>[~1200 bp]           | All Fungi                                                      | RPB2-5f<br>RPB2-7cR                                                                                                              | GAY GAY MGW GAT CAY TTY GG<br>CCC ATR GCT TGY TTR CCC AT             | Forward<br><br>Reverse | 1. 94°C – 3 min<br>2. 94°C – 20 sec<br>3. 55°C – 30 sec<br>4. 72°C – 1 min<br>5. Repeat 2–4 for 40 cycles<br>6. 72°C – 10 min<br>7. 4°C on hold                                         | <sup>5</sup>   |
| beta-tubulin ( <i>tub2/BenA</i> )<br>[~500 bp]                      | All Fungi<br><br>Barcoding marker for <i>Penicillium</i>       | Bt2a<br><br>Bt2b                                                                                                                 | GGT AAC CAA ATC GGT GCT GCT TTC<br>ACC CTC AGT GTA GTG ACC CTT GGC   | Forward<br><br>Reverse | 1. 95°C – 5 min<br>2. 94°C – 45 sec<br>3. 55°C – 45 sec<br>4. 72°C – 1 min<br>5. Repeat 2–4 for 35 cycles<br>6. 72°C – 7 min<br>7. 4°C on hold                                          | <sup>6</sup>   |

| Locus                                                                     | Lineage                                                                                                      | Primer                                                                                                                                                                                    | Primer Sequence 5'-3'                                                     | Direction              | PCR protocol                                                                                                                                                                                        | Reference        |
|---------------------------------------------------------------------------|--------------------------------------------------------------------------------------------------------------|-------------------------------------------------------------------------------------------------------------------------------------------------------------------------------------------|---------------------------------------------------------------------------|------------------------|-----------------------------------------------------------------------------------------------------------------------------------------------------------------------------------------------------|------------------|
| Calmodulin<br>( <i>CaM</i> )<br>[~580 bp]                                 | All Fungi<br><br>Barcoding<br>marker for<br><i>Aspergillus</i>                                               | CMD5<br><br>CMD6                                                                                                                                                                          | CCG AGT ACA AGG AGG CCT TC<br><br>CCG ATA GAG GTC ATA ACG TGG             | Forward<br><br>Reverse | 1. 94°C – 1 min<br>2. 94°C – 1 min<br>3. 55°C – 30 sec<br>4. 72°C – 1.5 min (90 sec)<br>5. Repeat 2–4 for 42 cycles or Standard Repeat<br>2–4 for 35 cycles).<br>6. 72°C – 10 min<br>7. 4°C on hold | <sup>7</sup>     |
| Mini<br>chromosome<br>maintenance<br>protein ( <i>MCM7</i> )<br>[~650 bp] | All Fungi                                                                                                    | Mcm7-<br>709for<br>Mcm7-<br>1348rev                                                                                                                                                       | ACI MGI GTI TCV GAY GTH AAR CC<br><br>GAY TTD GCI ACI CCI GGR TCW CCC AT  | Forward<br><br>Reverse | 1. 94°C – 5 min<br>2. 94°C – 45 sec<br>3. 56°C – 50 sec<br>4. 72°C – 1 min<br>5. Repeat 2–4 for 38 cycles<br>6. 72°C – 5 min<br>7. 4°C on hold                                                      | <sup>8,9</sup>   |
| Translation<br>elongation factor<br>1-alpha ( <i>tef1</i> )<br>[~1300 bp] | <i>Trichoderma</i><br><br>Barcoding<br>marker                                                                | EF1-728F<br><br>TEF1LLere<br>v<br><br>This<br>fragment<br>includes the<br>fourth and<br>fifth introns<br>and a<br>significant<br>portion of<br>the last<br>large<br>exon <sup>10,11</sup> | CAT CGA GAA GTT CGA GAA GG<br><br>AAC TTG CAG GCA ATG TGG                 | Forward<br><br>Reverse | 1. 94°C – 2 min<br>2. 66°C – 56°C touchdown (9 cycles)<br>3. 94°C – 30 sec<br>4. 56°C – 1 min<br>5. 72°C – 1 min<br>6. Repeat 3–6 for 36 cycles<br>7. 72°C – 10 min<br>8. 4°C on hold               | <sup>12,13</sup> |
| Translation<br>elongation factor<br>1-alpha ( <i>tef1</i> )<br>[~700 bp]  | <i>Fusarium</i> ID<br><br>For <i>Fusarium</i><br>identification<br><br>Intron rich<br>portion of <i>tef1</i> | ef1<br><br>ef2                                                                                                                                                                            | ATG GGT AAG GA(A/G) GAC AAG AC<br><br>GGA (G/A)GT ACC AGT (G/C)AT CAT GTT | Forward<br><br>Reverse | 1. 95°C – 8 min<br>2. 95°C – 30 sec<br>3. 53°C – 60 sec<br>4. 72°C – 1 min<br>5. Repeat 2–4 for 35 cycles<br>6. 72°C – 5 min<br>7. 4°C on hold                                                      | <sup>14,15</sup> |

| Locus                                                                             | Lineage                                                                                                                                                                                                                        | Primer                   | Primer Sequence 5'-3'                                        | Direction              | PCR protocol                                                                                                                                   | Reference        |
|-----------------------------------------------------------------------------------|--------------------------------------------------------------------------------------------------------------------------------------------------------------------------------------------------------------------------------|--------------------------|--------------------------------------------------------------|------------------------|------------------------------------------------------------------------------------------------------------------------------------------------|------------------|
| *Partial actin<br>[~370 bp]                                                       | Sordariomycetes,<br>and<br>Dothideomycetes<br>including Plant<br>pathogenic fungi<br><i>Colletotrichum</i> ,<br><i>Mycosphaerella</i><br>and anamorphs,<br><i>Phoma</i> -like,<br><i>Phyllosticta</i> ,<br><i>Verticillium</i> | act-512F<br><br>act-783R | ATG TGC AAG GCC GGT TTC GC<br><br>TAC GAG TCC TTC TGG CCC AT | Forward<br><br>Reverse | 1. 95°C – 8 min<br>2. 94°C – 15 sec<br>3. 55°C – 20 sec<br>4. 72°C – 1 min<br>5. Repeat 2–4 for 35 cycles<br>6. 72°C – 5 min<br>7. 4°C on hold | <sup>12</sup>    |
| Internal<br>Transcribed<br>Spacer (ITS)<br>region of the<br>rRNA<br>[~450-800 bp] | Official fungal<br>barcode                                                                                                                                                                                                     | ITS1F<br>ITS4            | CTT GGT CAT TTA GAG GAA GTA A<br>TCC TCC GCT TAT TGA TAT GC  | Forward<br>Reverse     | 1. 95°C – 5 min<br>2. 94°C – 30 s<br>3. 52°C – 30 s<br>4. 72°C – 1 min<br>5. Repeat 2–4 for 35 cycles<br>6. 72°C – 8 min<br>7. 4°C on hold     | <sup>16</sup>    |
| Small Subunit<br>(SSU, 18S) of the<br>rRNA<br>[~1200 bp]                          | All Fungi                                                                                                                                                                                                                      | NS1<br>NS4               | GTA GTC ATA TGC TTG TCT C<br>CTT CCG TCA ATT CCT TTA AG      | Forward<br>Reverse     | Same protocol as ITS region                                                                                                                    | <sup>16</sup>    |
| Large Subunit<br>(LSU, 28S) of<br>the rRNA<br>[~1200 bp]                          | All Fungi                                                                                                                                                                                                                      | LROR<br>LR6              | ACC CGC TGA ACT TAA GC<br>CGC CAG TTC TGC TTA CC             | Forward<br>Reverse     | Same protocol as ITS region                                                                                                                    | <sup>17,18</sup> |

\*For protein-coding genes, we have found that using 5µl of DNA works better than lower amounts. Newly extracted DNA usually performs better than DNA stored for several years in -80C for PCR of protein-coding genes.

For additional information on other fungal primers, see:

<http://lutzonilab.org/primer-sequences/>

<http://www.fungalbarcoding.org/DefaultInfo.aspx?Page=Primers>

[http://www2.clarku.edu/faculty/dhibbett/Protocols\\_Folder/Primers/Primers.pdf](http://www2.clarku.edu/faculty/dhibbett/Protocols_Folder/Primers/Primers.pdf)

Table S2. Do's and Don'ts for molecular identification of Fungi

| <b>Do's</b>                                                                                                                                                                                                                                                                                                                         | <b>Don'ts and its consequences</b>                                                                                                                                                                                                                                                                                                                                                                                                                                       |
|-------------------------------------------------------------------------------------------------------------------------------------------------------------------------------------------------------------------------------------------------------------------------------------------------------------------------------------|--------------------------------------------------------------------------------------------------------------------------------------------------------------------------------------------------------------------------------------------------------------------------------------------------------------------------------------------------------------------------------------------------------------------------------------------------------------------------|
| Do insure culture purity. It is important to insure that the culture, which is going to be used for DNA extraction, is pure and/or contamination free.                                                                                                                                                                              | Don't use an impure/contaminated culture for DNA work. An impure culture will result in mixed signals during Sanger sequencing and result in poor quality chromatograms and thus preclude proper base calls and will ultimately result in poor quality sequence data, which will make identification via BLAST search and DNA taxonomy inaccurate.                                                                                                                       |
| Do ensure DNA extraction, PCR purification kits and molecular biology grade water are free of impurities.                                                                                                                                                                                                                           | Don't use contaminated solutions/buffers. Any problems with molecular biology kits will most likely cause problems with downstream application such as PCR and Sanger sequencing. Consider making smaller aliquots of water in 1.5mL centrifuge tubes and discarding after each use.                                                                                                                                                                                     |
| Nucleotide BLAST search: Use published sequences from BLAST search results. Ensure that type-sequences from ex-type cultures are used. Include sequences from type-material.                                                                                                                                                        | Don't use sequences that are unpublished without checking for the presence of specimen vouchers and other collection information connected to the unpublished sequences prior to using them.                                                                                                                                                                                                                                                                             |
| Use a query coverage of $\geq 80\%$ and $\geq 97-100\%$ sequence similarity as a probable match for identification based on BLAST search; higher is better.                                                                                                                                                                         | Don't simply use the first result from a BLAST search as your species identification. Don't use $\leq 80\%$ query coverage and $\leq 95\%$ sequence similarity as a species match.                                                                                                                                                                                                                                                                                       |
| Download the top BLAST matches and align your query sequence and the top BLAST matches to look for sequence homology and again, include authenticate/reference published sequences preferably from type-material.                                                                                                                   | Don't solely rely on BLAST search results. Use DNA taxonomy and tree-building methods when possible (see section 6).                                                                                                                                                                                                                                                                                                                                                     |
| Do include all citations and accession numbers, including reference strain numbers of fungi, which are identical to your unknown fungus. Provide BLAST search results as a summary of the top BLAST matches.                                                                                                                        | Don't simply give your fungus a name based on the first line of the BLAST search results. Most likely identifying your fungus based on BLAST search in INSD alone will lead to incorrect identification.                                                                                                                                                                                                                                                                 |
| Do sequence single-copy protein-coding genes when possible.                                                                                                                                                                                                                                                                         | Don't simply rely on ITS region for identification, especially in lineages such as Hypocreales (e.g. <i>Fusarium</i> , <i>Trichoderma</i> ) and Eurotiales (e.g. <i>Aspergillus</i> and <i>Penicillium</i> ) as well as genera that are very diverse and poorly represented in GenBank. If you do use ITS, make sure you compare with type sequences/reference strains in curated databases. Don't use 18S rDNA region for species-level identification (see section 2). |
| Do sequence the entire ITS region (ITS1-5.8S-ITS2).                                                                                                                                                                                                                                                                                 | Don't use only the ITS1 or ITS2 region. Although these have been utilized for identification in metabarcoding studies, <sup>19,20</sup> it might result in inconclusive species-identification.                                                                                                                                                                                                                                                                          |
| Do utilize curated sequence databases for BLAST search when possible (See Table1).                                                                                                                                                                                                                                                  | Don't simply rely on INSD: GenBank, EMBL, DDJB.                                                                                                                                                                                                                                                                                                                                                                                                                          |
| Do submit your newly acquired sequence to GenBank and include the accession number in the manuscript. When submitting a sequence to GenBank, include as much annotation as possible, especially specimen voucher or strain details. After the manuscript is published, inform GenBank of release of sequence and provide details of | Don't forget to contact GenBank after the paper is published. If not, your sequence will remain as unpublished and may not be included in future BLAST search analyses or molecular phylogenies by mycologists and/or natural products chemists.                                                                                                                                                                                                                         |

|                                                                                                                                                                                                                    |                                                                                                                                                                          |
|--------------------------------------------------------------------------------------------------------------------------------------------------------------------------------------------------------------------|--------------------------------------------------------------------------------------------------------------------------------------------------------------------------|
| pagination.                                                                                                                                                                                                        |                                                                                                                                                                          |
| Do include macro and micro-morphological details of fungal culture when available for the identification of your fungus.                                                                                           | Don't simply use molecular sequence data alone if morphological characters are abundantly available.                                                                     |
| Do include citations of papers from which sequences are utilized in your own study.                                                                                                                                | Not doing so will fail to provide due credit to the fungal taxonomist and systematists who have done all the hard work that enabled you to identify your unknown fungus. |
| Do realize that fungi are hyperdiverse and not all fungal sequences are deposited in INSD; it is likely that you have an undescribed/unknown or previously not sequenced fungus.                                   | Don't assume that all fungal sequences are available and 100% accurately identified in INSD.                                                                             |
| If you do have a new fungus, describe it in a mycology journal. General information on how to describe a new fungus is provided elsewhere. <sup>21</sup> Deposit ITS sequence data from the new fungus in GenBank. | Don't describe a new fungus in a supplementary information section of a chemistry journal. If possible, don't simply describe a new fungus based solely on morphology.   |
| Do collaborate with trained mycologists when possible. Data generated by natural products chemists are useful for fungal taxonomy and vice versa.                                                                  | Don't work in isolation! Collaborations will foster learning about the fungal kingdom and knowledge about its secondary metabolite chemistry.                            |

## REFERENCES

- (1) Rehner, S. A.; Buckley, E. *Mycologia* **2005**, *97*, 84-98.
- (2) Stielow, J.; Lévesque, C.; Seifert, K.; Meyer, W.; Irinyi, L.; Smits, D.; Renfurm, R.; Verkley, G.; Groenewald, M.; Chaduli, D. *Persoonia* **2015**, *35*, 242-263.
- (3) Stiller, J. W.; Hall, B. D. *Proc. Natl. Acad. Sci. U.S.A.* **1997**, *94*, 4520-4525.
- (4) Matheny, P. B.; Liu, Y. J.; Ammirati, J. F.; Hall, B. D. *Am. J. Bot.* **2002**, *89*, 688-698.
- (5) Liu, Y. J.; Whelen, S.; Hall, B. D. *Mol. Biol. Evol.* **1999**, *16*, 1799-1808.
- (6) Glass, N. L.; Donaldson, G. C. *Appl. Environ. Microbiol.* **1995**, *61*, 1323-1330.
- (7) Hong, S.-B.; Go, S.-J.; Shin, H.-D.; Frisvad, J. C.; Samson, R. A. *Mycologia* **2005**, *97*, 1316-1329.
- (8) Schmitt, I.; Crespo, A.; Divakar, P. K.; Fankhauser, J. D.; Herman-Sackett, E.; Kalb, K.; Nelsen, M. P.; Nelson, N. A.; Rivas-Plata, E.; Shimp, A. D.; Widhalm, T.; Lumbsch, H. T. *Persoonia* **2009**, *23*, 35-40.
- (9) Raja, H.; Schoch, C. L.; Hustad, V.; Shearer, C.; Miller, A. *MycKeys* **2011**, *1*, 63-94.
- (10) Druzhinina, I.; Kubicek, C. P. *J. Zhejiang Univ. Sci. B* **2005**, *6*, 100.
- (11) Druzhinina, I. S.; Kopchinskiy, A. G.; Komoń, M.; Bissett, J.; Szakacs, G.; Kubicek, C. P. *Fungal Genet. Biol.* **2005**, *42*, 813-828.
- (12) Carbone, I.; Kohn, L. M. *Mycologia* **1999**, 553-556.
- (13) Jaklitsch, W. M.; Komon, M.; Kubicek, C. P.; Druzhinina, I. S. *Mycologia* **2005**, *97*, 1365-1378.
- (14) Geiser, D.; Jimenez-Gasco, M.; Kang, S.; Makalowska, I.; Veeraraghavan, N.; Ward, T.; Zhang, N.; Kuldau, G. *Eur. J. Plant Pathol.* **2004**, *110*, 473-479.
- (15) Maciá-Vicente, J. G.; Jansson, H.-B.; Abdullah, S. K.; Descals, E.; Salinas, J.; Lopez-Llorca, L. V. *FEMS Microbiol. Ecol.* **2008**, *64*, 90-105.
- (16) White, T. J.; Bruns, T.; Lee, S. H.; Taylor, J. W., *PCR protocols: a guide to methods and application*. San Diego, 1990; p 315-322.
- (17) Vilgalys, R.; Hester, M. *J. Bacteriol.* **1990**, *172*, 4238-4246.
- (18) Rehner, S. A.; Samuels, G. J. *Can. J. Bot.* **1995**, *73*, S816-S823.
- (19) Bazzicalupo, A. L.; Bálint, M.; Schmitt, I. *Fungal Ecol.* **2013**, *6*, 102-109.
- (20) Blaaid, R.; Kumar, S.; Nilsson, R. H.; Abarenkov, K.; Kirk, P. M.; Kauserud, H. *Mol. Ecol. Resour.* **2013**, *13*, 218-24.
- (21) Seifert, K. A.; Rossman, A. Y. *IMA Fungus* **2010**, *1*, 109-116.
